# Supplementary material for: 160-fold acceleration of the Smith-Waterman algorithm using a field programmable gate array (FPGA)
Source: Springer Nature journal article supplement (doi:10.1186/1471-2105-8-185), 2007-06-07

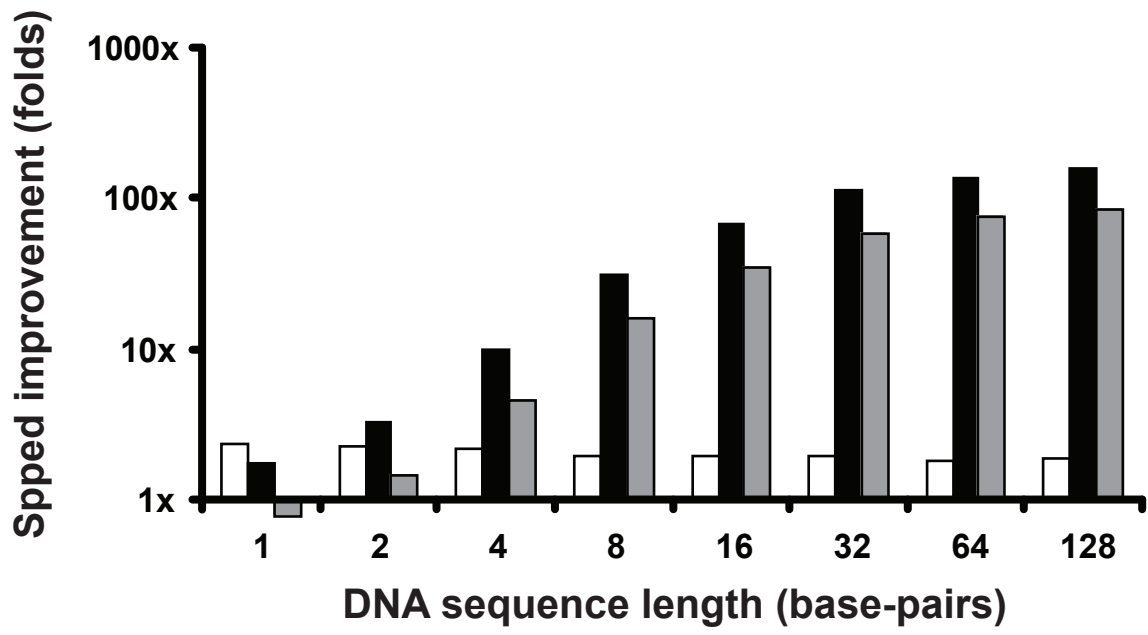

Supplement: 12859_2007_1557_MOESM8_ESM.pdf [file 12859_2007_1557_MOESM8_ESM.pdf]
